# Supplementary material
Source: Research Square preprint supplement (doi:10.21203/rs.3.rs-9285789/v1)
Supplement: Supplementary file 1 [file 1049493a7751fba9fffa1a21.docx]

Supplementary Material

Table S1 Family environment scale scoring criteria

Table S2 Correlation matrix of the family environment, health risk behaviors and mental health item scores

Table S3 Analysis of demographic characteristics of the included and excluded participants

Figure S1 Bootstrap analysis results for edge weights of the symptomatic network

Figure S2 Network estimates of family environment, health risk behaviors, and adolescent mental health symptoms in male and female

Figure S3 Centrality measurements of network nodes in male and female

Figure S4. Comparison of network properties between male and female participants

Table S1 Family environment scale scoring criteria

| Variable | Low-level | Moderate-level | High-level |
| --- | --- | --- | --- |
| Cohesion | 0-5 | 6-8 | 9 |
| Expressiveness | 0-4 | 5-7 | 8-9 |
| Conflict | 0-1 | 2-5 | 6-9 |
| Independence | 0-3 | 4-7 | 8-9 |
| Achievement Orientation | 0-5 | 6-8 | 9 |
| Intellectual-Cultural Orientation | 0-3 | 4-7 | 8-9 |
| Active-Recreational Orientation | 0-3 | 4-6 | 7-9 |
| Moral-Religious Emphasis | 0-4 | 5-7 | 8-9 |
| Organization | 0-5 | 6-8 | 9 |
| Control | 0-2 | 3-5 | 6-9 |

Table S2 Correlation matrix of the family environment, health risk behaviors and mental health item scores


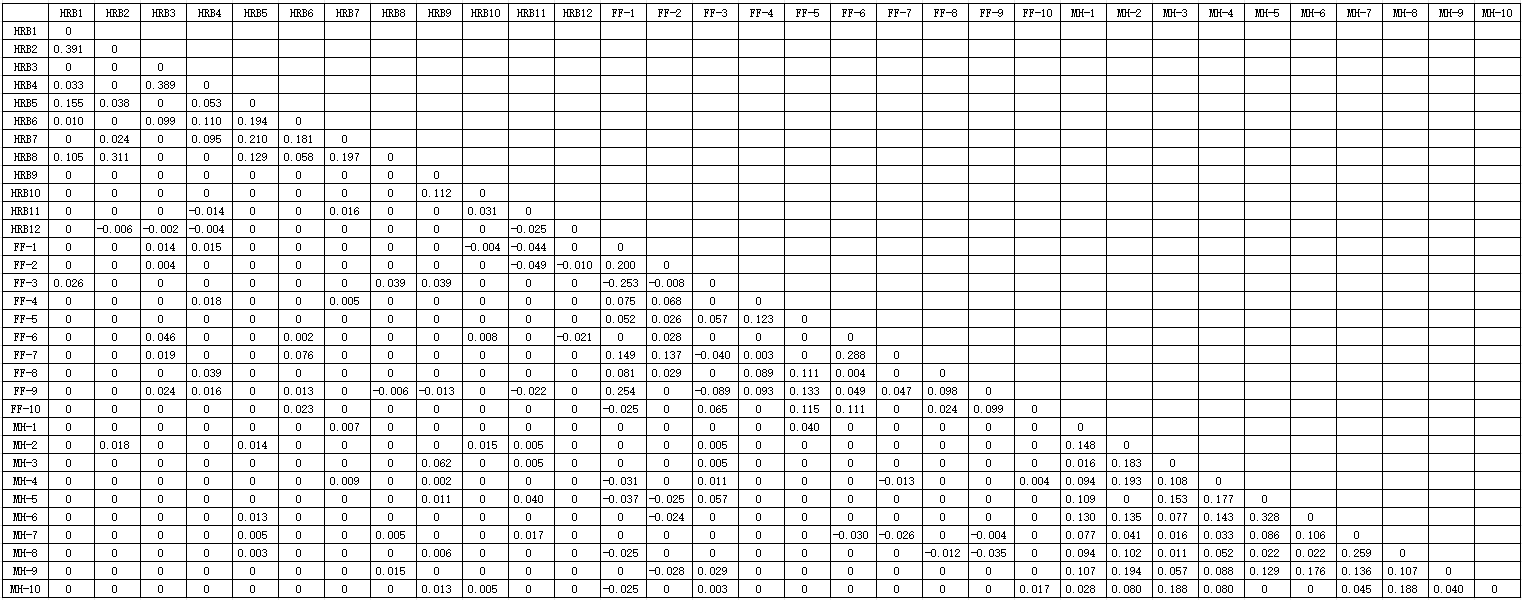


Table S3 Analysis of demographic characteristics of the included and excluded participants

| Variables | Including  (n=1601) | Excluding  (n=620) | Total  (n=2221) | *χ2/t* | *P* |
| --- | --- | --- | --- | --- | --- |
| Sex(n%) |  |  |  |  |  |
| boy | 313(19.6) | 134(21.6) | 447(20.1) | 1.183 | 0.277 |
| girl | 1288(80.4) | 486(78.4) | 1774(79.9) |  |  |
| Age (x±sd） | 16.7±7.6 | 17.1±9.8 | 16.8±8.3 | -1.083 | 0.279 |
| BMI(n%) |  |  |  |  |  |
| Underweight | 511(31.9) | 180(29.0) | 691(31.1) | 3.176 | 0.365 |
| Normal | 560(35.0) | 212(34.2) | 772(34.8) |  |  |
| Overweight | 75(4.7) | 30(4.8) | 105(4.7) |  |  |
| Obesity | 455(28.4) | 198(31.9) | 653(29.4) |  |  |
| Ethnicity(n%) |  |  |  |  |  |
| Han | 715(44.7) | 295(47.6) | 1010(45.5) | 1.538 | 0.215 |
| None of the above | 886(55.3) | 325(52.4) | 1211(54.5) |  |  |
| Educational level(n%) |  |  |  |  |  |
| Junior high school and below | 293(18.3) | 136(21.9) | 429(19.3) | 3.788 | 0.052 |
| High school/tertiary | 1308(81.7) | 484(78.1) | 1792(80.7) |  |  |
| Residential area(n%) |  |  |  |  |  |
| Rural | 609(38.0) | 213(34.4) | 822(37.0) | 2.602 | 0.107 |
| Urban | 992(62.0) | 407(65.6) | 1399(63.0) |  |  |
| One-child(n%) |  |  |  |  |  |
| No | 1387(86.6) | 547(88.2) | 1934(87.1) | 1.007 | 0.316 |
| Yes | 214(13.4) | 73(11.8) | 287(12.8) |  |  |
| Left-behind(n%) |  |  |  |  |  |
| No | 1450(90.6) | 562(90.6) | 2012(90.6) | 0.003 | 0.956 |
| Yes | 151(9.4) | 58(9.4) | 209(9.4) |  |  |
| Family structure(n%) |  |  |  |  |  |
| Nuclear family | 1211(75.6) | 467(75.3) | 1678(75.6) | 0.937 | 0.816 |
| Three-generation immediate family | 296(18.5) | 111(17.9) | 407(18.3) |  |  |
| Intergenerational family | 54(3.4) | 26(4.2) | 80(3.6) |  |  |
| Host family | 40(2.5) | 16(2.6) | 56(2.5) |  |  |
| Father's educational level(n%) |  |  |  |  |  |
| Primary and below | 237(14.8) | 86(13.9) | 323(14.5) | 2.120 | 0.548 |
| Junior high school | 830(51.8) | 335(54.0) | 1165(52.5) |  |  |
| High school/tertiary | 423(26.4) | 165(26.6) | 588(26.5) |  |  |
| College and above | 111(6.9) | 34(5.5) | 145(6.5) |  |  |
| Mother's educational level(n%) |  |  |  |  |  |
| Primary and below | 321(20.0) | 102(16.5) | 423(19.0) | 4.499 | 0.212 |
| Junior high school | 801(50.0) | 324(52.3) | 1125(50.7) |  |  |
| High school/tertiary | 376(23.5) | 158(25.5) | 534(24.0) |  |  |
| College and above | 103(6.4) | 36(5.8) | 139(6.3) |  |  |
| Marital status of parents(n%) |  |  |  |  |  |
| Stable marriage | 1270(79.3) | 496(80.0) | 1766(79.5) | 1.701 | 0.637 |
| Reorganization of marriage | 90(5.6) | 38(6.1) | 128(5.8) |  |  |
| Bereaved of one's spouse | 41(2.6) | 19(3.1) | 60(2.7) |  |  |
| Divorcee | 200(12.5) | 67(10.8) | 267(12.0) |  |  |


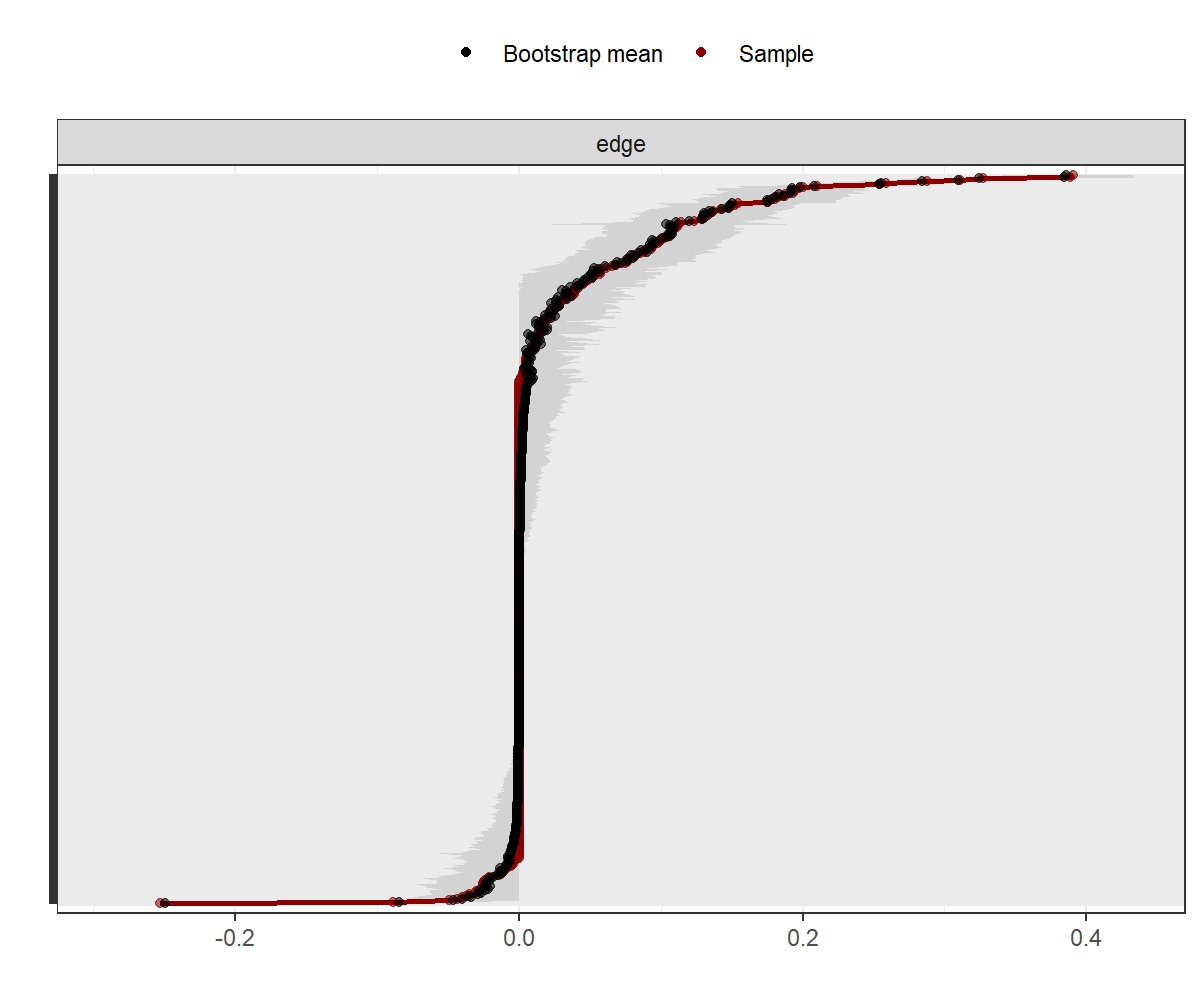


a


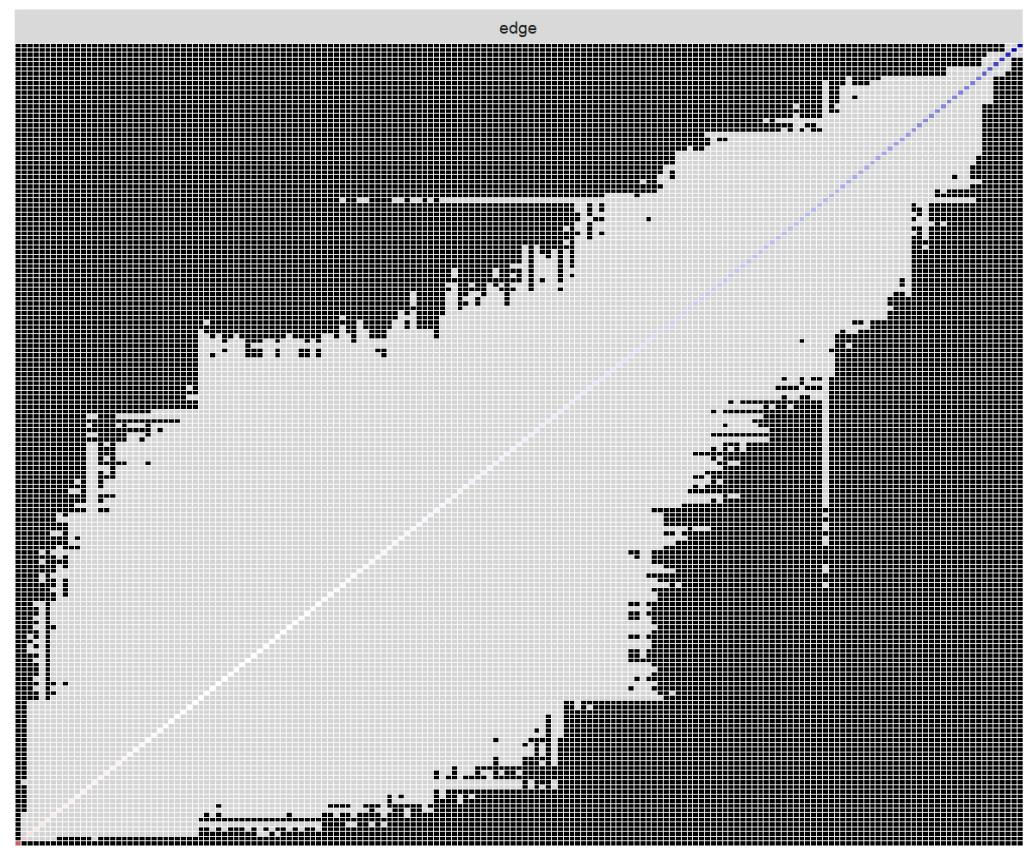
Figure S1: Bootstrap analysis results for edge weights of the symptomatic network

b

FigureS1. panel a and panel b: Non parametric bootstrapped difference test for edge. For this,95%CI bootstrapped confidence interval(CI) for edge-weights are constructed based on the variance in the bootstrapped sample. Based on the range of these CIs indicated that a wide interval represents low stability, and a network analysis interval represents high stability.


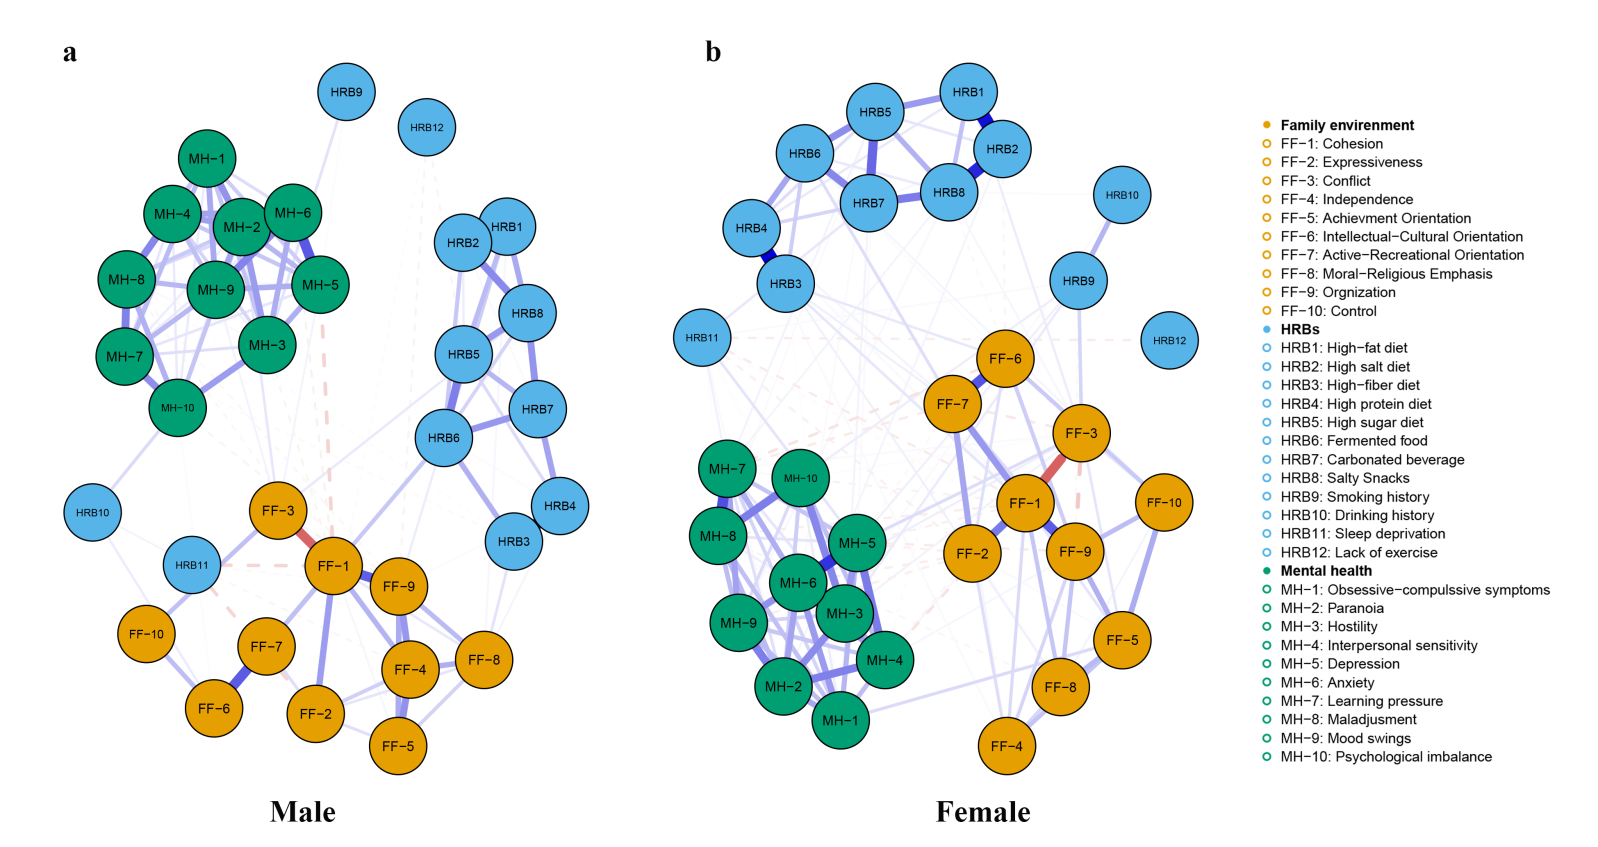


Figure S2: Network estimates of family environment, health risk behaviors, and adolescent mental health symptoms in male and female

Figure S3: Centrality measurements of network nodes in male and female

Figure S4: Comparison of network properties between male and female participants

Left Panel: Plot of bootstrap value of the maximum difference in any of the edge weights (1000 permutations), with no significant difference (p=0.052).

Right Panel: Plot of bootstrap value of the difference in network global strength, with no significant difference (network strength among male participants: 11.340; among female participants: 11.137, p=0.990).
